# Supplementary material
Source: publisher figshare collection journal article supplement (https://gsapubs.figshare.com/ndownloader/files/37378192)
Supplement: Supplementary file 1 [file 37378192]

## Sheet: Table1
Table S1
Eruption ID	Volcano	Country	Date/ Deposit Name	Deposit category	Deposit facies	Grainsize measurement method	Deconvolution method	No. points	Min Dist km	Max Dist km	Source grainsize data	Eruption Type	Mid Bulk volume (m3)	Deposit Density (kg/m3)	Mid Mass (kg)	Mid Magnitude	Magnitude Reference	Max Plume Height (km above the vent)	Plume Height Estimation Method	Plume Height Ref	PDCs
Askja_B	Askja	Iceland	28-29 March 1875 Layer B	Unimodal	Massive	sieve to 63 µm		4	5.1	29.4	(Sparks et al., 1981)	Magmatic	14000000	671.429	9400000000	2.97313	(Carey et al., 2010)	10	Isopleth and Carey and Sparks (1986)	(Carey et al., 2010)	N
Askja_C1	Askja	Iceland	28-29 March 1875 Layer C1	Unimodal	Stratified	sieve to 63 µm		24	1.9	66.3	(Sparks et al., 1981; Carey et al., 2010)	Phreatomagmatic	450000000	1066.67	480000000000	4.68124	(Carey et al., 2010)	22.8	Pyle 1989	(Carey et al., 2010)	Y
Askja_D	Askja	Iceland	28-29 March 1875 Layer D	Unimodal	Massive	sieve to 63 µm - mostly proximal data		39	1.4	144	(Sparks et al., 1981)	Magmatic	1370000000	365	500000000000	4.69897	(Carey et al., 2010)	26	Isopleth and Carey and Sparks (1986)	(Carey et al., 2010)	Y
Aso_2003	Aso	Japan	10 July 2003	Unimodal	Massive	Laser diffraction Malvern Mastersizer		2	0.9	4.4	(Miyabuchi et al., 2008)	Phreatomagmatic			41000	-2.38722	(Miyabuchi et al., 2008)	0.5	Wind direction data	(Miyabuchi et al., 2008)	N
Aso_2004	Aso	Japan	14 January 2004	Unimodal	Massive	Laser diffraction Malvern Mastersizer		2	0.5	5	(Miyabuchi et al., 2008)	Phreatomagmatic			32000	-2.49485	(Miyabuchi et al., 2008)	0.8	Visual observation	(Miyabuchi et al., 2008)	N
Campanian	Campi Flegrei	Italy	Campanian Plinian fall	Bimodal with distal unimodal distributions	Stratified	Laser diffraction Malvern Mastersizer	SFT	35	125	2250	(Engwell et al., 2014)	Magmatic	20000000000	1000	20000000000000	6.30103	(Perrotta and Scarpati, 2003)	44	Isopleth and Carey and Sparks (1986)	(Rosi et al., 1999)	Y
Chaiten	Chaiten	Chile	6 May 2008	Unimodal with scattered bimodal distributions	Stratified	Laser diffraction Malvern Mastersizer	DECOLOG	64	3.4	642	(Alfano et al., 2016; Watt et al., 2009)	Magmatic			160000000000	4.20412	(Watt et al., 2009)	18.9	Satellite plume top temp	(Carn et al., 2009)	Y
Cotopaxi_L3	Cotopaxi	Ecuador	Layer 3	Unimodal	Massive			13	9.6	25	(Tsunematsu and Bonadonna, 2015)	Magmatic	2400000000	1000	2400000000000	5.38021	(Biass and Bonadonna, 2011)	21	Isopleth and Carey and Sparks (1986)	(Biass and Bonadonna, 2011)	Y
Cotopaxi_L5	Cotopaxi	Ecuador	Layer 5	Unimodal	Massive			23	4.7	25	(Tsunematsu and Bonadonna, 2015)	Magmatic	500000000	1000	500000000000	4.69897	(Biass and Bonadonna, 2011)	20	Isopleth and Carey and Sparks (1986)	(Biass and Bonadonna, 2011)	N
ElChichon	El Chichon	Mexico	4 April 1982 (B+C)	Unimodal	Stratified	Laser diffraction		13	16	280	(Rose and Durant, 2009)	Magmatic	800000000	1000	800000000000	4.90309	(Rose and Durant, 2009)	32	Isopleth and Carey and Sparks (1986)	(Carey and Sigurdsson, 1986)	Y
Eldgja	Eldgja	Iceland	Unit 7 (magmatic)	Unimodal	Massive	sediGraph		26	0.8	22	(Moreland, 2017)	Magmatic	24000000	830	70000000000	3.8451	(Moreland, 2017)	17	Isopleth and Carey and Sparks (1986) and Mastin et al. (2009) empirical relation	(Moreland, 2017)	N
Etna_18-19May2016	Etna	Italy	18-19 May 2016	Unimodal	Massive	Sieving		11	10.5	18.9	(Edwards et al., 2018)	Magmatic			35500000	0.550228	(Edwards et al., 2018)	3.5	Satelite detection using cloud top temperature	(Edwards et al., 2018)	N
Etna_21May2016	Etna	Italy	21 May 2016	Unimodal	Massive	Sieving		16	5.8	27.6	(Edwards et al., 2018)	Magmatic			5550000	-0.255707	(Edwards et al., 2018)	3	Satelite detection using cloud top temperature	(Edwards et al., 2018)	N
Etna_27Oct2002	Etna	Italy	27 October 2002	Unimodal	Massive	Not Stated		4	3.7	28.7	(Andronico et al., 2008)	Magmatic		1067	870000000	1.93952	(Andronico et al., 2008)	3.2	Direct Observation	(Andronico et al., 2008)	N
Etna_28Oct2002	Etna	Italy	28 October 2002	Unimodal	Massive	Not Stated		4	3.7	25.4	(Andronico et al., 2008)	Magmatic		1067	1050000000	2.02119	(Andronico et al., 2008)	4.2	Direct Observation	(Andronico et al., 2008)	N
Etna_31Oct_2002	Etna	Italy	31 October 2002	Unimodal	Massive	Not Stated		4	9.8	18.7	(Andronico et al., 2008)	Magmatic		1067	450000000	1.65321	(Andronico et al., 2008)	3.7	Direct Observation	(Andronico et al., 2008)	N
Etna_4Nov2002	Etna	Italy	4 November 2002	Unimodal	Massive	Not Stated		4	10.4	24.4	(Andronico et al., 2014)	Magmatic		1067	1390000000	2.14301	(Andronico et al., 2008)	2.9	Direct Observation	(Andronico et al., 2008)	N
Etna_Jan2011	Etna	Italy	12-13 January 2011	Unimodal	Massive	Sieving and camsizer		38	0.9	103	(Andronico et al., 2014)	Magmatic		1000	150000000	1.17609	(Andronico et al., 2014)	6	Direct Observation	(Calveri et al. 2011, Andronico et al. 2014)	N
Etna_July2001	Etna	Italy	July 2001	Unimodal	Massive	Sieving		8	3	22	(Scollo et al., 2007)	Magmatic			1670000000	2.22272	(Scollo et al., 2007)	1.68	Inversion modelling using HAZMAP	(Scollo et al., 2007)	N
Eyja_14-16April	Eyjafjallajökull	Iceland	14-16 April 2010	Unimodal with scattered bimodal distributions	Massive	laser diffraction + laser absorptio in a dry suspension (Gislason)	DECOLOG	9	2	60.6	(Bonadonna et al., 2011; Dellino et al., 2012; Gislason et al., 2011a; Gislason et al., 2011b; Gudmundsson et al., 2012)	Phreatomagmatic	70000000	1400	98000000000	3.99123	(Gudmundsson et al., 2012)	8	Weather radar	(Gudmundsson et al., 2012)	N
Eyja_4May	Eyjafjallajökull	Iceland	4 May 2010	Unimodal	Massive	laser diffraction + laser absorptio in a dry suspension (Gislason)		2	10.1	20	(Bonadonna et al., 2011; Dellino et al., 2012; Gislason et al., 2011a; Gislason et al., 2011b; Gudmundsson et al., 2012)	Magmatic			7500000000	2.87506	(Gudmundsson et al., 2012)	4	Weather radar	(Gudmundsson et al., 2012)	N
Eyja_5May	Eyjafjallajökull	Iceland	5 May 2010	Unimodal	Massive	laser diffraction + laser absorptio in a dry suspension (Gislason)		2	2	9.6	(Bonadonna et al., 2011; Dellino et al., 2012; Gislason et al., 2011a; Gislason et al., 2011b; Gudmundsson et al., 2012)	Magmatic			35000000000	3.54407	(Gudmundsson et al., 2012)	6	Weather radar	(Gudmundsson et al., 2012)	N
Eyja_6May	Eyjafjallajökull	Iceland	6 May 2010	Unimodal	Massive	laser diffraction + laser absorptio in a dry suspension (Gislason)		4	20.1	56	(Bonadonna et al., 2011; Dellino et al., 2012; Gislason et al., 2011a; Gislason et al., 2011b; Gudmundsson et al., 2012)	Magmatic			7500000000	2.87506	(Gudmundsson et al., 2012)	8.2	Weather radar	(Gudmundsson et al., 2012)	N
Eyja_7May	Eyjafjallajökull	Iceland	7 May 2010	Unimodal with scattered bimodal distributions	Massive	laser diffraction + laser absorptio in a dry suspension (Gislason)	DECOLOG	4	10.7	39	(Bonadonna et al., 2011; Dellino et al., 2012; Gislason et al., 2011a; Gislason et al., 2011b; Gudmundsson et al., 2012)	Magmatic			7500000000	2.87506	(Gudmundsson et al., 2012)	5	Weather radar	(Gudmundsson et al., 2012)	N
Fuego	Fuego	Guatemala	14 October 1974	Bimodal	Massive	Coulter counter + laser diffraction	DECOLOG	31	8	57	(Rose et al., 2008)	Magmatic	41000000	1100	45100000000	3.65418	(Rose et al., 2008)	11	Comparison of dispersal with wind data	(Rose et al., 2008)	Y
GlacierPeak	Glacier Peak	USA	11.2 ka Chiwawa ash (Layer B)	Bimodal with distal unimodal distributions	Stratified	Electrosensing zone method (Elzone Celloscope)	Not stated. Probably by hand	6	78	899	(Brazier et al., 1983)	Magmatic	6500000000	900	5850000000000	5.76716	(Gardner et al., 1998)	31	Isopleth and Carey and Sparks (1986)	(Gardner et al., 1998)	Y
Grimsvotn	Grimsvotn	Iceland	21-22 May 2011	Unimodal	Stratified	Sieving + laser absorption in a dry dispersion		3	50	115	(Liu et al., 2015; Olsson et al., 2013)	Magmatic	#REF!		729000000000	4.86273	(Hreinsdóttir et al., 2014)	18.3	C-band and X-band radar	(Petersen et al., 2012a; Petersen et al., 2012b)	N
Heimaey	Heimaey *	Iceland	1 Feb 1973 Scoria fall II	Unimodal	Massive	Sieving		14	0.3	2.06	(Self et al., 1974)	Magmatic				NA	(Self et al., 1974)	1	From terminal fall velocity and distanced reached from source	(Self et al., 1974)	N
Hekla_1104	Hekla	Iceland	1104	Unimodal	Massive	Laser diffraction Malvern Mastersizer		13	8	215	(Janebo et al., 2018)	Magmatic	950000000	400	380000000000	4.57978	(Janebo et al., 2016)	25	Isopleth and Carey and Sparks (1986)	(Janebo et al., 2016)	N
Hekla_1300	Hekla	Iceland	1300D (opening phase)	Unimodal	Massive	Laser diffraction Malvern Mastersizer		9	10	211	(Janebo et al., 2018)	Magmatic	350000000	740	259000000000	4.4133	(Janebo et al., 2016)	25	Isopleth and Carey and Sparks (1986)	(Janebo et al., 2016)	N
Hekla_1693	Hekla	Iceland	1693	Unimodal	Massive	Laser diffraction Malvern Mastersizer		11	7.5	164	(Janebo et al., 2018)	Magmatic	200000000	560	112000000000	4.04922	(Janebo et al., 2016)	17	Isopleth and Carey and Sparks (1986)	(Janebo et al., 2016)	N
Hekla_1766	Hekla	Iceland	1766	Unimodal	Massive	Laser diffraction Malvern Mastersizer		10	8	219	(Janebo et al., 2018)	Magmatic	200000000	420	84000000000	3.92428	(Janebo et al., 2016)	18	Isopleth and Carey and Sparks (1986)	(Janebo et al., 2016)	N
Hekla_1845	Hekla	Iceland	1845	Bimodal	Massive	SediGraph 5120 X-ray particle analyzer	DECOLOG	46	3.6	87.6	(Gudnason et al., 2018)	Magmatic	170000000	600	102000000000	4.0086	(Gudnason et al., 2018)	30	Isopleth and Carey and Sparks (1986) and Mastin et al. (2009) empirical relation	(Gudnason et al., 2018)	N
Hekla_1947	Hekla	Iceland	1947	Unimodal	Stratified	Microscope		8	3.5	3800	(Thorarinsson, 1954)	Magmatic	180000000	666.667	120000000000	4.07918	(Thorarinsson, 1954)	28.5	Eyewitness account + photographs	(Thorarinsson, 1954)	N
Hekla_1991	Hekla	Iceland	17-18 January 1991 (opening phase)	Unimodal	Stratified	Beckmann Coulter LS230		26	4.2	195	(Gudnason et al., 2017)	Magmatic	17500000	500	9000000000	2.95424	(Gudnason et al., 2017)	11.5	Weather radar Met Office + Pilot observation	(Gudmundsson et al., 1992)	N
Huaynaputina	Huaynaputina	Peru	1600 stage-1 plinian fall deposit	Unimodal	Stratified	Sieving		28	17	115	(Adams et al., 2001)	Magmatic	13500000000	650	8775000000000	5.94325	(Prival et al., 2019)	31	Isoplets+Bonadonna and Costa 2013 + Rossi et al, 2019	(Prival et al., 2019)	Y
Hudson	Cerro Hudson	Chile	12-15 August 1991	Bimodal	Stratified	Pipette method	DECOLOG LogNormal	4	108	528	(Scasso et al., 1994)	Magmatic	7590000000	1000	7590000000000	5.88024	(Scasso et al., 1994)	18	Satellite temperature data	(Kratzmann et al., 2010)	N
Hverfjall_phreato	Krafla	Iceland	2500 BP Hverfjall Fires Phreatomag	Unimodal	Massive	Sieving + laser diffraction Malvern Mastersizer		16	1.2	19.8	(Liu et al., 2017)	Phreatomagmatic	80000000	1000	80000000000	3.90309	(Liu et al., 2017)	NA	NA	NA	NA
Kelud	Kelud	Indonesia	13 February 2014	Unimodal	Massive	Not stated		8	4	51	(Maeno et al., 2019)	Magmatic	315000000	1400	441000000000	4.64444	(Maeno et al., 2019)	26	Analysis of satelite imagery	(Vernier et al., 2016)	Y
Kirishima	Kirishima	Japan	26-27 January 2011 (unit 2)	Unimodal	Stratified (subtle)	Sieving to 5phi		15	3.1	30.4	(Miyabuchi et al., 2013)	Magmatic	5300000	1100	5830000000	2.76567	(Miyabuchi et al., 2013)	7.08	Weather radar	(Miyabuchi et al., 2013; Suzuki and Koyaguchi, 2013)	N
Mazama	Crater Lake	USA	7.7 ka Mazama	Bimodal with distal unimodal distributions	Stratified	Electrosensing zone method (Elzone Celloscope)	Not stated. Probably by hand	5	55	990	(Brazier et al., 1983)	Magmatic	148000000000	900	133200000000000	7.1245	(Buckland et al., 2020)	55	Using grainsize trend in Pyle 1989	(Gardner et al., 1998)	Y
Minoan	Santorini	Greece	3.5 ka Minoan	Bimodal with distal unimodal distributions	Stratified	Electrosensing zone method (Elzone Celloscope)	Not stated. Probably by hand	14	5	479	(Bond and Sparks, 1976; Sparks et al., 1984)	Magmatic			40000000000000	6.60206	(Johnston, 2014)	38	Isopleth and Carey and Sparks (1986)	(Pyle, 1990)	Y
Montserrat	Soufriere Hills	Montserrat	26 September 1997	Bimodal	Massive	Sieving+electrosensing zone method	DECOLOG	3	5.7	7.6	(Bonadonna et al., 2002)	Magmatic	500000	1000	500000000	1.69897	(Bonadonna and Costa, 2012)	10.4	Satelite detection using cloud top temperature	(Bonadonna et al., 2002)	Y
MSH_1980	Mount St. Helens	USA	18 May 1980	Bimodal with distal unimodal distributions	Stratified then Massive	Laser diffraction	DECOLOG	33	136	640	(Durant et al., 2009; Eychenne et al., 2015b)	Magmatic	1100000000	472.727	520000000000	4.716	(Sarna-Wojcicki et al., 1981)	27.5	Radar and satellite	(Carey et al., 1990; Eychenne et al., 2015a; Sparks et al., 1986)	Y
MSH_Yn	Mount St. Helens	USA	3.5 ka Yn	Bimodal with distal unimodal distributions	Stratified	Electrosensing zone method (Elzone Celloscope)	Not stated. Probably by hand	10	93	388	(Brazier et al., 1983)	Magmatic	15300000000	900	13770000000000	6.13893	(Gardner et al., 1998)	31	Isopleth and Carey and Sparks (1986)	(Gardner et al., 1998)	Y
Pinatubo	Pinatubo	Phillipines	15 June 1991	Bimodal with distal unimodal distributions	Massive	wet-sieving and pipetting + Galai CIS-100 laster particle sizer	DECOLOG	11	88	768	(Rosi et al., 2001; Wiesner et al., 2004)	Magmatic	5200000000	1100	5720000000000	5.7574	(Wiesner et al., 2004)	38.3	Satelite detection	(Holasek et al., 1996)	Y
Pululagua	Pululagua	Ecuador	2450 BP - BF2 layer	Unimodal	Massive	Sieve and mastersizer		51	4.9	29.8	(Volentik et al., 2010)	Magmatic	450000000		250000000000	4.39794	(Volentik et al., 2010)	23.78	Inversion modelling using Tephra2	(Volentik et al., 2010)	Y
Quizapu	Quizapu	Chile	10-11 April 1932	Unimodal	Stratified	Sieving		10	4.3	1125	(Hildreth and Drake, 1992)	Magmatic	9500000000	600	5700000000000	5.75587	(Hildreth and Drake, 1992)	32	Isopleths, Wilson and Walker, Visual observations	(Hildreth and Drake, 1992)	Y
Reykjanes	Reykjanes	Iceland	CE1226-medieval_tephra	Unimodal	Massive	sediGraph		12	6.5	64	(Magnúsdóttir, 2015)	Phreatomagmatic	100000000	1000	100000000000	4	(Magnúsdóttir, 2015)		Not stated		N
Ruapehu	Ruapehu	New Zealand	17 June 1996	Unimodal with scattered bimodal distributions	Massive			104	0.5	182.6	(Bonadonna and Houghton, 2005)*	Magmatic	4000000	1000	4000000000	2.60206	(Bonadonna and Costa, 2012)	5.703	Satelite detection	(Bonadonna and Houghton, 2005; Prata and Grant, 2001)	N
Rungwe	Rungwe	Tanzania	4ka Rungwe Pumice	Unimodal	Massive	Sieving		59	5.7	30.2	(Fontijn et al., 2011)	Magmatic			2000000000000	5.30103	(Fontijn et al., 2011)	35	Isopleth and Carey and Sparks (1986)	(Fontijn et al., 2011)	N
Spurr_Aug	Mount Spurr	Alaska	18 August 1992	Unimodal with scattered bimodal distributions	Massive	Laser diffraction	DECOLOG	27	5.2	363	(Eychenne et al., 2017; McGimsey et al., 2001)	Magmatic	52000000	700	36000000000	3.5563	(McGimsey et al., 2001)	10.4	Ground based C band radar	(Rose et al., 1995)	Y
Spurr_Sept	Mount Spurr	Alaska	16-17 September 1992	Unimodal	Massive	Laser diffraction		20	3.6	376	(Eychenne et al., 2017; McGimsey et al., 2001)	Magmatic	56000000	700	39000000000	3.59106	(McGimsey et al., 2001)	10.6	Ground based C band radar	(Rose et al., 1995)	Y
Tambora	Tambora	Indonesia	1815 Total Fallout	Bimodal with distal unimodal distributions	Stratified	Laser diffraction Malvern Mastersizer	LOGN2D + DECOLOG	7	44	422	(Kandlbauer et al., 2013)	Magmatic	11000000000	636	6996000000000	5.84485	(Kandlbauer and Sparks, 2014)	43	Isopleth and Carey and Sparks (1986)	(Sigurdsson and Carey 1989)	Y
Taupo	Taupo	New Zealand	186AD	Unimodal	Stratified according to Houghton et al, 2014	Sieving		108	9.6	228.4	(Walker, 1980)	Magmatic	9000000000	550	4950000000000	5.69461	(Pyle, 1989; Walker, 1980)	37	Isopleth and Carey and Sparks (1986)	(Houghton et al., 2014)	Y
Tungurahua	Tungurahua	Ecuador	16 August 2006	Bimodal	Massive	Laser diffraction Malvern Mastersizer	LOGN2D	22	7.9	20.6	(Eychenne et al., 2012)	Magmatic	42000000	980	41100000000	3.61384	(Eychenne et al., 2013; Eychenne et al., 2012)	18	Isopleth and Carey and Sparks (1986) + cloud top temperature	(Eychenne et al., 2012; Steffke et al., 2010)	Y
* Unpublished raw grainsize data provided by the authors
Adams, N. K., de Silva, S. L., Self, S., Salas, G., Schubring, S., Permenter, J. L., and Arbesman, K., 2001, The physical volcanology of the 1600 eruption of Huaynaputina, southern Peru: Bulletin of Volcanology, v. 62, no. 8, p. 493-518.
Alfano, F., Bonadonna, C., Watt, S., Connor, C., Volentik, A., and Pyle, D. M., 2016, Reconstruction of total grain size distribution of the climactic phase of a long-lasting eruption: the example of the 2008–2013 Chaitén eruption: Bulletin of Volcanology, v. 78, no. 7, p. 46.
Andronico, D., Scollo, S., Caruso, S., and Cristaldi, A., 2008, The 2002–03 Etna explosive activity: Tephra dispersal and features of the deposits: Journal of Geophysical Research: Solid Earth, v. 113, no. B4, p. n/a-n/a.
Andronico, D., Scollo, S., Cristaldi, A., and Lo Castro, M. D., 2014, Representivity of incompletely sampled fall deposits in estimating eruption source parameters: a test using the 12–13 January 2011 lava fountain deposit from Mt. Etna volcano, Italy: Bulletin of Volcanology, v. 76, no. 10, p. 861.
Biass, S., and Bonadonna, C., 2011, A quantitative uncertainty assessment of eruptive parameters derived from tephra deposits: the example of two large eruptions of Cotopaxi volcano, Ecuador: Bulletin of Volcanology, v. 73, no. 1, p. 73-90.
Bonadonna, C., and Costa, A., 2012, Estimating the volume of tephra deposits: A new simple strategy: Geology, v. 40, no. 5, p. 415-418.
Bonadonna, C., Genco, R., Gouhier, M., Pistolesi, M., Cioni, R., Alfano, F., Hoskuldsson, A., and Ripepe, M., 2011, Tephra sedimentation during the 2010 Eyjafjallajökull eruption (Iceland) from deposit, radar, and satellite observations: Journal of Geophysical Research: Solid Earth, v. 116, no. B12, p. B12202.
Bonadonna, C., and Houghton, B. F., 2005, Total grain-size distribution and volume of tephra-fall deposits: Bulletin of Volcanology, v. 67, no. 5, p. 441-456.
Bonadonna, C., Mayberry, G. C., Calder, E. S., Sparks, R. S. J., Choux, C., Jackson, P., Lejeune, A. M., Loughlin, S. C., Norton, G. E., Rose, W. I., Ryan, G., and Young, S. R., 2002, Tephra fallout in the eruption of Soufriere Hills Volcano, Montserrat: Geological Society, London, Memoirs, v. 21, no. 1, p. 483-516.
Bond, A., and Sparks, R. S. J., 1976, The Minoan eruption of Santorini, Greece: Journal of the geological society of London, v. 132, p. 1-16.
Brazier, S., Sparks, R. S. J., Carey, S. N., Sigurdsson, H., and Westgate, J. A., 1983, Bimodal grain size distribution and secondary thickening in air-fall ash layers: Nature, v. 301, p. 115-119.
Buckland, H. M., Cashman, K. V., Engwell, S. L., and Rust, A. C., 2020, Sources of uncertainty in the Mazama isopachs and the implications for interpreting distal tephra deposits from large magnitude eruptions: Bulletin of Volcanology, v. 82, no. 3, p. 23.
Calvari, S., Salerno, G.G., Spampinato, L., Gouhier, M., La Spina, A., Pecora, E., Harris, A.J., Labazuy, P., Biale, E. and Boschi, E., 2011. An unloading foam model to constrain Etna's 11–13 January 2011 lava fountaining episode. Journal of Geophysical Research: Solid Earth, 116(B11).
Carey, R. J., Houghton, B. F., and Thordarson, T., 2010, Tephra dispersal and eruption dynamics of wet and dry phases of the 1875 eruption of Askja Volcano, Iceland: Bulletin of Volcanology, v. 72, no. 3, p. 259-278.
Carey, S., and Sigurdsson, H., 1986, The 1982 eruptions of El Chichon volcano, Mexico (2): Observations and numerical modelling of tephra-fall distribution: Bulletin of Volcanology, v. 48, p. 127-141.
Carey, S., Sigurdsson, H., Gardner, J. E., and Criswell, C. W., 1990, Variations in column height and magma discharge during the May 18, 1980 eruption of Mount St Helens: Journal of Volcanology and Geothermal Research, v. 43, p. 99-112.
Carn, S. A., Pallister, J. S., Lara, L., Ewert, J. W., Watt, S., Prata, A. J., Thomas, R. J., and Villarosa, G., 2009, The Unexpected Awakening of Chaitén Volcano, Chile: Eos, Transactions American Geophysical Union, v. 90, no. 24, p. 205-206.
Dellino, P., Gudmundsson, M. T., Larsen, G., Mele, D., Stevenson, J. A., Thordarson, T., and Zimanowski, B., 2012, Ash from the Eyjafjallajökull eruption (Iceland): Fragmentation processes and aerodynamic behavior: Journal of Geophysical Research: Solid Earth, v. 117, no. B9, p. n/a-n/a.
Durant, A. J., Rose, W. I., Sarna-Wojcicki, A. M., Carey, S., and Volentik, A. C. M., 2009, Hydrometeor-enhanced tephra sedimentation: Constraints from the 18 May 1980 eruption of Mount St. Helens: Journal of Geophysical Research, v. 114, no. B3.
Edwards, M. J., Pioli, L., Andronico, D., Scollo, S., Ferrari, F., and Cristaldi, A., 2018, Shallow factors controlling the explosivity of basaltic magmas: The 17–25 May 2016 eruption of Etna Volcano (Italy): Journal of Volcanology and Geothermal Research, v. 357, p. 425-436.
Engwell, S. L., Sparks, R. S. J., and Carey, S., 2014, Physical characteristics of tephra layers in the deep sea realm: the Campanian Ignimbrite eruption: Geological Society, London, Special Publications.
Eychenne, J., Cashman, K. V., Rust, A. C., and Durant, A., 2015a, Impact of the lateral blast on the spatial pattern and grain size characteristics of the May 18, 1980 Mount St. Helens fallout deposit: Journal of Geophysical Research, v. 120, p. 6018-6038.
Eychenne, J., Houghton, B., Swanson, D., Carey, R., and Swavely, L., 2015b, Dynamics of an open basaltic magma system: the 2008 activity of the Halemaʻumaʻu Overlook vent, Kīlauea Caldera: Earth and Planetary Science Letters, v. 409, p. 19-60.
Eychenne, J., Le Pennec, J.-L., Ramón, P., and Yepes, H., 2013, Dynamics of explosive paroxysms at open-vent andesitic systems: High-resolution mass distribution analyses of the 2006 Tungurahua fall deposit (Ecuador): Earth and Planetary Science Letters, v. 361, p. 343-355.
Eychenne, J., Le Pennec, J.-L., Troncoso, L., Gouhier, M., and Nedelec, J.-M., 2012, Causes and consequences of bimodal grain-size distribution of tephra fall deposited during the August 2006 Tungurahua eruption (Ecuador): Bulletin of Volcanology, v. 74, no. 1, p. 187-205.
Eychenne, J., Rust, A. C., Cashman, K. V., and Wobrock, W., 2017, Distal Enhanced Sedimentation From Volcanic Plumes: Insights From the Secondary Mass Maxima in the 1992 Mount Spurr Fallout Deposits: Journal of Geophysical Research: Solid Earth, v. 122, no. 10, p. 7679-7697.
Fontijn, K., Ernst, G. G. J., Bonadonna, C., Elburg, M. A., Mbede, E., and Jacobs, P., 2011, The ~4-ka Rungwe Pumice (South-Western Tanzania): a wind-still Plinian eruption: Bulletin of Volcanology, v. 73, no. 9, p. 1353-1368.
Gardner, J. E., Carey, S., and Sigurdsson, H., 1998, Plinian eruptions at Glacier Peak and Newberry volcanoes, United States: Implications for volcanic hazards in the Cascade Range: GSA Bulletin, v. 110, no. 2, p. 173-187.
Gislason, S. R., Alfredsson, H. A., Eiriksdottir, E. S., Hassenkam, T., and Stipp, S. L. S., 2011a, Volcanic ash from the 2010 Eyjafjallajökull eruption: Applied Geochemistry, v. 26, p. S188-S190.
Gislason, S. R., Hassenkam, T., Nedel, S., Bovet, N., Eiriksdottir, E. S., Alfredsson, H. A., Hem, C. P., Balogh, Z. I., Dideriksen, K., Oskarsson, N., Sigfusson, B., Larsen, G., and Stipp, S. L. S., 2011b, Characterization of Eyjafjallajökull volcanic ash particles and a protocol for rapid risk assessment: Proceedings of the National Academy of Sciences, v. 108, no. 18, p. 7307-7312.
Gudmundsson, A., Oskarsson, N., Gronvold, K., Saemundsson, K., Sigurdsson, O., Stefansson, R., Gislason, S. R., Einarsson, P., Brandsdottir, B., Larsen, G., Johannesson, H., and Thordarson, T., 1992, The 1991 eruption of Hekla, Iceland: Bulletin of Volcanology, v. 54, no. 3, p. 238-246.
Gudmundsson, M. T., Thordarson, T., Höskuldsson, Á., Larsen, G., Björnsson, H., Prata, F. J., Oddsson, B., Magnússon, E., Högnadóttir, T., Petersen, G. N., Hayward, C. L., Stevenson, J. A., and Jónsdóttir, I., 2012, Ash generation and distribution from the April-May 2010 eruption of Eyjafjallajökull, Iceland, v. 2, p. 572.
Gudnason, J., Thordarson, T., Houghton, B. F., and Larsen, G., 2017, The opening subplinian phase of the Hekla 1991 eruption: properties of the tephra fall deposit: Bulletin of Volcanology, v. 79, no. 5, p. 34.
Gudnason, J., Thordarson, T., Houghton, B. F., and Larsen, G., 2018, The 1845 Hekla eruption: Grain-size characteristics of a tephra layer: Journal of Volcanology and Geothermal Research, v. 350, p. 33-46.
Hildreth, W., and Drake, R. E., 1992, Volcan Quizapu, Chilean Andes: Bull Volcanol, v. 54, p. 63-125.
Holasek, R. E., Self, S., and Woods, A. W., 1996, Satellite observations and interpretation of the 1991 Mount Pinatubo eruption plumes: Journal of Geophysical Research: Solid Earth, v. 101, no. B12, p. 27635-27655.
Houghton, B. F., Carey, R. J., and Rosenberg, M. D., 2014, The 1800a Taupo eruption: “III wind” blows the ultraplinian type event down to Plinian: Geology, v. 42, no. 5, p. 459-461.
Hreinsdóttir, S., Sigmundsson, F., Roberts, M. J., Björnsson, H., Grapenthin, R., Arason, P., Árnadóttir, T., Hólmjárn, J., Geirsson, H., Bennett, R. A., Gudmundsson, M. T., Oddsson, B., Ófeigsson, B. G., Villemin, T., Jónsson, T., Sturkell, E., Höskuldsson, Á., Larsen, G., Thordarson, T., and Óladóttir, B. A., 2014, Volcanic plume height correlated with magma-pressure change at Grímsvötn Volcano…
Janebo, M. H., Houghton, B. F., Thordarson, T., Bonadonna, C., and Carey, R. J., 2018, Total grain-size distribution of four subplinian–Plinian tephras from Hekla volcano, Iceland: Implications for sedimentation dynamics and eruption source parameters: Journal of Volcanology and Geothermal Research, v. 357, p. 25-38.
Janebo, M. H., Thordarson, T., Houghton, B. F., Bonadonna, C., Larsen, G., and Carey, R. J., 2016, Dispersal of key subplinian–Plinian tephras from Hekla volcano, Iceland: implications for eruption source parameters: Bulletin of Volcanology, v. 78, no. 10, p. 66.
Johnston, E., 2014, Tephra dispersal and volume of the Bronze age eruption of Santorini [PhD: University of Bristol, 405 p.
Kandlbauer, J., Carey, S. N., and Sparks, R. S. J., 2013, The 1815 Tambora ash fall: implications for transport and deposition of distal ash on land and in the deep sea: Bulletin of Volcanology, v. 75, no. 4, p. 1-11.
Kandlbauer, J., and Sparks, R. S. J., 2014, New estimates of the 1815 Tambora eruption volume: Journal of Volcanology and Geothermal Research, v. 286, p. 93-100.
Kratzmann, D. J., Carey, S. N., Fero, J., Scasso, R. A., and Naranjo, J.-A., 2010, Simulations of tephra dispersal from the 1991 explosive eruptions of Hudson volcano, Chile: Journal of Volcanology and Geothermal Research, v. 190, no. 3–4, p. 337-352.
Liu, E. J., Cashman, K. V., Rust, A. C., and Gislason, S. R., 2015, The role of bubbles in generating fine ash during hydromagmatic eruptions: Geology, v. 43, no. 3, p. 239-242.
Liu, E. J., Cashman, K. V., Rust, A. C., and Höskuldsson, A., 2017, Contrasting mechanisms of magma fragmentation during coeval magmatic and hydromagmatic activity: the Hverfjall Fires fissure eruption, Iceland: Bulletin of Volcanology, v. 79, no. 10, p. 68.
Maeno, F., Nakada, S., Yoshimoto, M., Shimano, T., Hokanishi, N., Zaennudin, A., and Iguchi, M., 2019, A sequence of a plinian eruption preceded by dome destruction at Kelud volcano, Indonesia, on February 13, 2014, revealed from tephra fallout and pyroclastic density current deposits: Journal of Volcanology and Geothermal Research, v. 382, p. 24-41.
Magnúsdóttir, A. O., 2015, Characteristics of the CE 1226 Medieval tephra layer from the Reykjanes volcanic system [Master: University of Iceland.
McGimsey, R. G., Neal, C. A., and Riley, C. M., 2001, Areal distribution, thickness, mass, volume and grainsize of tephra-fall deposits from the 1992 eruptions of Creater Peak vent, Mt. Spurr Volcano, Alaska: U.S. Geological Survey Open-File Report, v. 01-370.
Miyabuchi, Y., Hanada, D., Niimi, H., and Kobayashi, T., 2013, Stratigraphy, grain-size and component characteristics of the 2011 Shinmoedake eruption deposits, Kirishima Volcano, Japan: Journal of Volcanology and Geothermal Research, v. 258, p. 31-46.
Miyabuchi, Y., Ikebe, S.-i., and Watanabe, K., 2008, Geological constraints on the 2003–2005 ash emissions from the Nakadake crater lake, Aso Volcano, Japan: Journal of Volcanology and Geothermal Research, v. 178, no. 2, p. 169-183.
Moreland, W., 2017, Explosive activity in flood lava eruptions: A case study of the 10th century eldgjá eruption: Iceland (Ph. D. Thesis), University of Iceland.
Olsson, J., Stipp, S. L. S., Dalby, K. N., and Gislason, S. R., 2013, Rapid release of metal salts and nutrients from the 2011 Grímsvötn, Iceland volcanic ash: Geochimica et Cosmochimica Acta, v. 123, p. 134-149.
Perrotta, A., and Scarpati, C., 2003, Volume partition between the plinian and co-ignimbrite air fall deposits of the Campanian Ignimbrite eruption: Mineralogy and Petrology, v. 79, no. 1, p. 67-78.
Petersen, G. N., Bjornsson, H., and Arason, P., 2012a, The impact of the atmosphere on the Eyjafjallajökull 2010 eruption plume: Journal of Geophysical Research: Atmospheres, v. 117, no. D20.
Petersen, G. N., Bjornsson, H., Arason, P., and von Löwis, S., 2012b, Two weather radar time series of the altitude of the volcanic plume during the May 2011 eruption of Grímsvötn, Iceland: Earth Syst. Sci. Data, v. 4, no. 1, p. 121-127.
Prata, A. J., and Grant, I. F., 2001, Retrieval of microphysical and morphological properties of volcanic ash plumes from satellite data: Application to Mt Ruapehu, New Zealand: Quarterly Journal of the Royal Meteorological Society, v. 127, no. 576, p. 2153-2179.
Prival, J. M., Thouret, J. C., Japura, S., Gurioli, L., Bonadonna, C., Mariño, J., and Cueva, K., 2019, New insights into eruption source parameters of the 1600 CE Huaynaputina Plinian eruption, Peru: Bulletin of Volcanology, v. 82, no. 1, p. 7.
Pyle, D. M., 1989, The thickness, volume and grainsize of tephra fall deposits: Bulletin of Volcanology, v. 51, p. 1-15.
Pyle, D. M., 1990, New estimates for the volume of the Minoan eruption: Thera and the Aegean World III, v. 2, p. 113-121.
Rose, W., and Durant, A., 2009, El Chichon volcano, 4 April 1982: Volcanic cloud history and fine ash fallout: Nat Haz, v. 51, p. 363 - 374.
Rose, W., Kostinski, A., and Kelley, L., 1995, Real-Time C-Band Radar Observations of 1992 Eruption Clouds from Crater Peak, Mount Spurr Volcano, Alaska: The 1992 eruptions of Crater PEak vent, Mount Spurr volcano, Alaska. U.S. Geological Survey Bulletin, v. 2139.
Rose, W., Self, S., Murrow, P., Bonadonna, C., Durant, A., and Ernst, G., 2008, Nature and significance of small volume fall deposits at composite volcanoes: Insights from the October 14, 1974 Fuego eruption, Guatemala: Bulletin of Volcanology, v. 70, no. 9, p. 1043-1067.
Rosi, M., Paladio-Melosantos, M., Di Muro, A., Leoni, R., and Bacolcol, T., 2001, Fall vs flow activity during the 1991 climactic eruption of Pinatubo Volcano (Philippines): Bulletin of Volcanology, v. 62, no. 8, p. 549-566.
Rosi, M., Vezzoli, L., Castelmenzano, A., and Grieco, G., 1999, Plinian pumice fall deposit of the Campanian Ignimbrite eruption (Phlegraean Fields, Italy): Journal of Volcanology and Geothermal Research, v. 91, no. 2, p. 179-198.
Sarna-Wojcicki, A., Shipley, S., Waitt, R. B., Dzurisin, D., and Wood, S., 1981, Aeral distribution, thickness , mass, volume and grain size of air-fall ash from the six major eruptions of 1980: U.S. Geological Survey Professional Paper, v. 1250, p. 577-600.
Scasso, R. A., Corbella, H., and Tiberi, P., 1994, Sedimentological analysis of the tephra from the 12–15 August 1991 eruption of Hudson volcano: Bulletin of Volcanology, v. 56, no. 2, p. 121-132.
Scollo, S., Del Carlo, P., and Coltelli, M., 2007, Tephra fallout of 2001 Etna flank eruption: Analysis of the deposit and plume dispersion: Journal of Volcanology and Geothermal Research, v. 160, no. 1, p. 147-164.
Self, S., Sparks, R. S. J., Booth, B., and Walker, G. P. L., 1974, The 1973 Heimaey Strombolian Scoria deposit, Iceland: Geological Magazine, v. 111, no. 6, p. 539-548.
Sigurdsson, H. and Carey, S., 1989. Plinian and co-ignimbrite tephra fall from the. Bulletin of Volcanology, 51(4), pp.243-270.
Sparks, R. S. J., Brazier, S., Huang, T. C., and Muerdter, D., 1984, Sedimentology of the Minoan deep-sea tephra layer in the Aegean and eastern Mediterranean: Marine Geology, v. 54, p. 131-167.
Sparks, R. S. J., Moore, J. G., and Rice, C. J., 1986, The initial giant umbrella cloud of the May 18th, 1980, explosive eruption of Mount St. Helens: Journal of Volcanology and Geothermal Research, v. 28, p. 257-274.
Sparks, R. S. J., Wilson, L., and Sigurdsson, H., 1981, The pyroclastic deposits of the 1875 eruption of Askja, Iceland: Philosophical Transactions of the Royal Society of London. Series A, Mathematical and Physical Sciences, v. 299, no. 1447, p. 241-273.
Steffke, A. M., Fee, D., Garces, M., and Harris, A., 2010, Eruption chronologies, plume heights and eruption styles at Tungurahua Volcano: Integrating remote sensing techniques and infrasound: Journal of Volcanology and Geothermal Research, v. 193, no. 3-4, p. 143-160.
Stoiber, R., 1974, Eruption of Volcan Fuego- October 14, 1974: Bull Volcanol, v. 38, p. 861 - 869
Suzuki, Y. J., and Koyaguchi, T., 2013, 3D numerical simulation of volcanic eruption clouds during the 2011 Shinmoe-dake eruptions: Earth, Planets and Space, v. 65, no. 6, p. 10.
Thorarinsson, S., 1954, The eruption of Hekla, 1947-1948, Part II 3. The tephra-fall from Hekla on March 29 th, 1947: Visindafelag Islendinga, v. 68.
Tsunematsu, K., and Bonadonna, C., 2015, Grain-size features of two large eruptions from Cotopaxi volcano (Ecuador) and implications for the calculation of the total grain-size distribution: Bulletin of Volcanology, v. 77, no. 7, p. 64.
Vernier, J.-P., Fairlie, T. D., Deshler, T., Natarajan, M., Knepp, T., Foster, K., Wienhold, F. G., Bedka, K. M., Thomason, L., and Trepte, C., 2016, In situ and space-based observations of the Kelud volcanic plume: The persistence of ash in the lower stratosphere: Journal of Geophysical Research: Atmospheres, v. 121, no. 18, p. 11,104-111,118.
Volentik, A. C. M., Bonadonna, C., Connor, C. B., Connor, L. J., and Rosi, M., 2010, Modeling tephra dispersal in absence of wind: Insights from the climactic phase of the 2450BP Plinian eruption of Pululagua volcano (Ecuador): Journal of Volcanology and Geothermal Research, v. 193, no. 1, p. 117-136.
Walker, G. P. L., 1980, The Taupo pumice: Product of the most powerful known (ultraplinian) eruption?: Journal of Volcanology and Geothermal Research, v. 8, no. 1, p. 69-94.
Watt, S. F. L., Pyle, D. M., Mather, T. A., Martin, R. S., and Matthews, N. E., 2009, Fallout and distribution of volcanic ash over Argentina following the May 2008 explosive eruption of Chaitén, Chile: J. Geophys. Res., v. 114, no. B4, p. B04207.
Wiesner, M. G., Wetzel, A., Catane, S. G., Listanco, E. L., and Mirabueno, H. T., 2004, Grain size, areal thickness distribution and controls on sedimentation of the 1991 Mount Pinatubo tephra layer in the South China Sea: Bulletin of Volcanology, v. 66, no. 3, p. 226-242.
